# Supplementary material for: Evidence of a Shift in the Littoral Fish Community of the Sacramento-San Joaquin Delta
Source: PLOS journal article supplement (doi:10.1371/journal.pone.0170683), 2017-01-24

**S1 Fig. Map of study area with beach seine survey locations and their respective site names (for use in conjunction with S1 Table)**

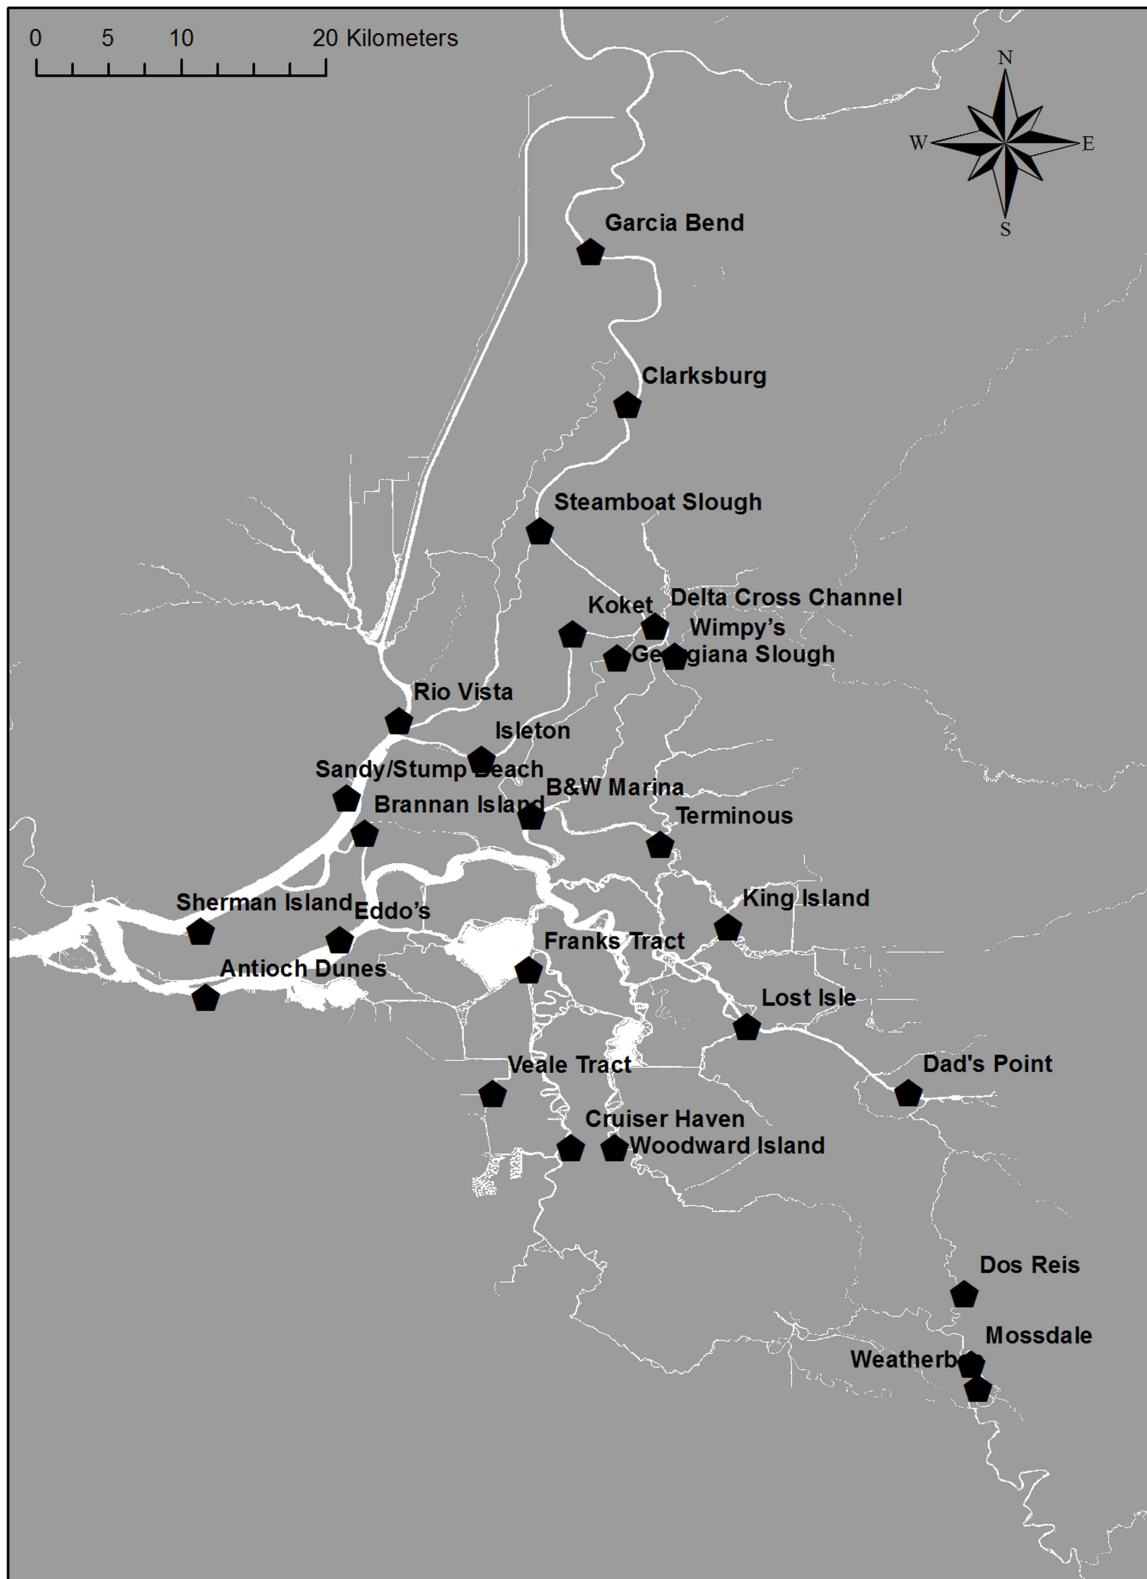

Supplement: S1 (10.1371/journal.pone.0170683.s001) [file journal.pone.0170683.s001]
